# Supplementary material
Source: ML conference proceedings conference paper supplement (https://openaccess.thecvf.com/content/WACV2025/html/Zhang_Precise_Integral_in_WACV_2025_paper.html)
Supplement: Supplementary file 1 [file Zhang_Precise_Integral_in_WACV_2025_supplemental.pdf]

## Precise Integral in NeRFs: Overcoming the Approximation Errors of Numerical Quadrature

### 1. Analysis of the Accumulated Radiance

#### 1.1. Approximation Errors of Numerical Quadrature

We provide additional clarification on the approximation error of numerical quadrature for the calculation of the accumulated radiance  $C(t_i, t_{i+1})$ .

Recall that  $C(t_i, t_{i+1})$  is defined as follows,

$$C(t_i, t_{i+1}) = \int_{t_i}^{t_{i+1}} T(t_i, t) \sigma(\mathbf{r}(t)) c(\mathbf{r}(t), \mathbf{d}) dt. \quad (1)$$

Let the second argument of  $C(t_i, t_{i+1})$  be variable, i.e., we have function  $C(t_i, t)$ , then we expand it into a Taylor series at  $t_i$  as follows,

$$C(t_i, t) = C(t_i, t_i) + C^{(1)}(t_i, t_i)(t - t_i) + \frac{C^{(2)}(t_i, t_i)}{2!}(t - t_i)^2 + \dots \quad (2)$$

$$= \sum_{n=0}^{\infty} \frac{C^{(n)}(t_i, t_i)}{n!} (t - t_i)^n. \quad (3)$$

By substituting  $t = t_{i+1}$  into equation Eq. (3), we obtain a precise manner for calculating  $C(t_i, t_{i+1})$  as follows,

$$\text{Precise: } C(t_i, t_{i+1}) = \sum_{n=1}^{\infty} \frac{C^{(n)}(t_i, t_i)}{n!} (t_{i+1} - t_i)^n. \quad (4)$$

In the numerical quadrature, it is assumed that within the segment  $[t_i, t_{i+1}]$ , both  $\sigma(\mathbf{r}(s))$  and  $c(\mathbf{r}(s))$  are constant (i.e., they are equal to  $\sigma(\mathbf{r}(t_i))$  and  $c(\mathbf{r}(t_i))$  respectively). As a result, the expression for  $C(t_i, t_{i+1})$  in Eq. (1) can be approximated and simplified to the form as follows,

$$\text{Quadrature: } C(t_i, t_{i+1}) \approx c(\mathbf{r}(t_i), \mathbf{d}) \left(1 - e^{-\sigma(\mathbf{r}(t_i))(t_{i+1} - t_i)}\right) \quad (5)$$

$$= \sum_{n=1}^{\infty} \frac{(-1)^{n+1} \sigma(\mathbf{r}(t_i))^n c(\mathbf{r}(t_i), \mathbf{d})}{n!} (t_{i+1} - t_i)^n, \quad (6)$$

where Eq. (6) is derived by utilizing  $1 - e^{-x} = \sum_{n=1}^{\infty} \frac{(-1)^n x^n}{n!}$  in Eq. (5).

Comparing Eq. (6) to Eq. (4), we can observe that the coefficients of the Taylor series terms are different. Specifically, we calculate the first two terms of the series coefficients of Eq. (4), see below,

$$\frac{C^{(1)}(t_i, t_i)}{1!} = \frac{(-1)^2 \sigma(\mathbf{r}(t_i)) c(\mathbf{r}(t_i), \mathbf{d})}{1!}, \quad (7)$$

$$\frac{C^{(2)}(t_i, t_i)}{2!} = \frac{(-1)^3 \sigma(\mathbf{r}(t_i))^2 c(\mathbf{r}(t_i), \mathbf{d})}{2!} \quad (8)$$

$$+ \frac{1}{2} [\sigma^{(1)}(\mathbf{r}(t_i)) c(\mathbf{r}(t_i), \mathbf{d}) + \sigma(\mathbf{r}(t_i)) c^{(1)}(\mathbf{r}(t_i), \mathbf{d})]. \quad (9)$$

As can be seen, the coefficients of the first term of Eq. (6) and Eq. (4) are the same (Eq. (7)), while the coefficients of the second term are different (Eq. (9)), and so are the higher terms. Therefore, the calculation method of quadrature has errors compared to the precise method.

## 1.2. The Unity of Theory and Practice

As mentioned in the main paper, we theoretically model  $C(t_i, t_{i+1})$  as,

$$C(t_i, t_{i+1}) = \sigma_{seg}(\mathbf{r}(t_i), \mathbf{r}(t_{i+1}))c_{seg}(\mathbf{r}(t_i), \mathbf{r}(t_{i+1}))(t_{i+1} - t_i), \quad (10)$$

and in practice, we employ the following equation to calculate  $C(t_i, t_{i+1})$ ,

$$C(t_i, t_{i+1}) = c_{seg}(\mathbf{r}(t_i), \mathbf{r}(t_{i+1})) \left( 1 - e^{-\sigma_{seg}(\mathbf{r}(t_i), \mathbf{r}(t_{i+1}))(t_{i+1} - t_i)} \right) \quad (11)$$

$$= \sum_{n=1}^{\infty} \frac{(-1)^{n+1} \sigma_{seg}(\mathbf{r}(t_i), \mathbf{r}(t_{i+1}))^n c_{seg}(\mathbf{r}(t_i), \mathbf{r}(t_{i+1}))}{n!} (t_{i+1} - t_i)^n. \quad (12)$$

As can be seen, Eq. (10) equals the first term of Eq. (12) ( $n = 1$ ); therefore Eq. (11) is a superset of our theoretical modeling. Moreover, Eq. (11) and Eq. (5) have the same overall structure, with the only difference being that each term is a unary function and a binary function, respectively. Therefore, it is very convenient to implement our method on existing approaches, most of which employ Eq. (5).

## 2. Per-scene Breakdown

Tabs. 1 to 6 provide a per-scene breakdown for quantity metrics in Synthetic-NeRF, NSVF, and TanksTemples datasets.

|                         |       |       |       |        |       |       |       |       |       |
|-------------------------|-------|-------|-------|--------|-------|-------|-------|-------|-------|
| PSNR $\uparrow$         | chair | drums | figus | hotdog | lego  | mats. | mic   | ship  | mean  |
| NeRF                    | 34.39 | 24.65 | 30.81 | 36.12  | 34.24 | 30.33 | 34.40 | 29.99 | 31.87 |
| PrecNeRF                | 35.29 | 25.07 | 31.98 | 36.78  | 36.11 | 31.20 | 35.14 | 30.61 | 32.77 |
| NGP                     | 35.86 | 25.18 | 33.83 | 37.81  | 36.12 | 29.80 | 37.08 | 31.19 | 33.36 |
| PrecNGP                 | 36.35 | 25.66 | 36.63 | 38.36  | 37.01 | 31.10 | 37.55 | 31.32 | 34.25 |
| SSIM $\uparrow$         | chair | drums | figus | hotdog | lego  | mats. | mic   | ship  | mean  |
| NeRF                    | 0.977 | 0.924 | 0.970 | 0.979  | 0.974 | 0.956 | 0.987 | 0.885 | 0.957 |
| PrecNeRF                | 0.982 | 0.929 | 0.975 | 0.981  | 0.981 | 0.963 | 0.989 | 0.888 | 0.961 |
| NGP                     | 0.986 | 0.932 | 0.982 | 0.983  | 0.981 | 0.950 | 0.992 | 0.900 | 0.963 |
| PrecNGP                 | 0.987 | 0.936 | 0.989 | 0.985  | 0.984 | 0.963 | 0.993 | 0.902 | 0.967 |
| LPIPS-vgg $\downarrow$  | chair | drums | figus | hotdog | lego  | mats. | mic   | ship  | mean  |
| NeRF                    | 0.032 | 0.087 | 0.038 | 0.037  | 0.032 | 0.056 | 0.016 | 0.151 | 0.056 |
| PrecNeRF                | 0.027 | 0.079 | 0.033 | 0.033  | 0.022 | 0.046 | 0.014 | 0.148 | 0.050 |
| NGP                     | 0.021 | 0.088 | 0.025 | 0.031  | 0.022 | 0.069 | 0.013 | 0.132 | 0.050 |
| PrecNGP                 | 0.018 | 0.084 | 0.016 | 0.028  | 0.019 | 0.053 | 0.011 | 0.129 | 0.045 |
| LPIPS-alex $\downarrow$ | chair | drums | figus | hotdog | lego  | mats. | mic   | ship  | mean  |
| NeRF                    | 0.015 | 0.061 | 0.022 | 0.017  | 0.012 | 0.024 | 0.009 | 0.096 | 0.032 |
| PrecNeRF                | 0.012 | 0.056 | 0.018 | 0.015  | 0.008 | 0.018 | 0.008 | 0.096 | 0.029 |
| NGP                     | 0.008 | 0.057 | 0.014 | 0.013  | 0.008 | 0.031 | 0.005 | 0.080 | 0.027 |
| PrecNGP                 | 0.007 | 0.053 | 0.008 | 0.011  | 0.007 | 0.020 | 0.005 | 0.077 | 0.023 |

Table 1. Quantitative results on each scene from the Synthetic-NeRF dataset

| PSNR $\uparrow$         | Wine. | Steam. | Toad  | Robot | Bike  | Palace | Space. | Life. | mean  |
|-------------------------|-------|--------|-------|-------|-------|--------|--------|-------|-------|
| NeRF                    | 28.89 | 36.20  | 33.21 | 36.91 | 37.92 | 36.98  | 35.27  | 33.40 | 34.85 |
| PrecNeRF                | 31.43 | 37.98  | 33.43 | 38.69 | 38.81 | 38.06  | 35.92  | 34.16 | 36.06 |
| NGP                     | 31.87 | 36.37  | 35.89 | 37.43 | 37.90 | 37.56  | 35.69  | 34.72 | 35.93 |
| PrecNGP                 | 32.34 | 37.57  | 36.54 | 39.25 | 38.80 | 38.12  | 36.85  | 35.40 | 36.86 |
| SSIM $\uparrow$         | Wine. | Steam  | Toad  | Robot | Bike  | Palace | Space. | Life. | mean  |
| NeRF                    | 0.938 | 0.987  | 0.963 | 0.992 | 0.990 | 0.974  | 0.987  | 0.963 | 0.974 |
| PrecNeRF                | 0.960 | 0.991  | 0.965 | 0.994 | 0.991 | 0.979  | 0.988  | 0.967 | 0.979 |
| NGP                     | 0.964 | 0.988  | 0.981 | 0.995 | 0.990 | 0.978  | 0.980  | 0.967 | 0.980 |
| PrecNGP                 | 0.966 | 0.990  | 0.983 | 0.995 | 0.991 | 0.979  | 0.984  | 0.970 | 0.982 |
| LPIPS-vgg $\downarrow$  | Wine. | Steam  | Toad  | Robot | Bike  | Palace | Space. | Life. | mean  |
| NeRF                    | 0.078 | 0.024  | 0.046 | 0.012 | 0.014 | 0.026  | 0.018  | 0.056 | 0.034 |
| PrecNeRF                | 0.046 | 0.017  | 0.044 | 0.009 | 0.012 | 0.021  | 0.016  | 0.052 | 0.027 |
| NGP                     | 0.045 | 0.022  | 0.023 | 0.010 | 0.015 | 0.019  | 0.029  | 0.043 | 0.026 |
| PrecNGP                 | 0.044 | 0.017  | 0.020 | 0.008 | 0.014 | 0.018  | 0.027  | 0.039 | 0.023 |
| LPIPS-alex $\downarrow$ | Wine. | Steam  | Toad  | Robot | Bike  | Palace | Space. | Life. | mean  |
| NeRF                    | 0.050 | 0.010  | 0.028 | 0.004 | 0.004 | 0.012  | 0.009  | 0.026 | 0.018 |
| PrecNeRF                | 0.023 | 0.007  | 0.026 | 0.003 | 0.003 | 0.009  | 0.008  | 0.022 | 0.013 |
| NGP                     | 0.021 | 0.009  | 0.012 | 0.004 | 0.004 | 0.009  | 0.018  | 0.019 | 0.012 |
| PrecNGP                 | 0.020 | 0.007  | 0.010 | 0.002 | 0.003 | 0.008  | 0.015  | 0.017 | 0.010 |

Table 2. Quantitative results on each scene from the NSVF dataset

| PSNR $\uparrow$         | Ignatius | Truck | Barn  | Caterpillar | Family | mean  |
|-------------------------|----------|-------|-------|-------------|--------|-------|
| NeRF                    | 26.80    | 25.85 | 27.30 | 24.84       | 32.52  | 27.46 |
| PrecNeRF                | 26.91    | 26.29 | 27.83 | 25.26       | 32.85  | 27.83 |
| NGP                     | 28.19    | 27.65 | 27.66 | 26.09       | 34.34  | 28.78 |
| PrecNGP                 | 28.48    | 28.23 | 28.53 | 26.38       | 34.51  | 29.23 |
| SSIM $\uparrow$         | Ignatius | Truck | Barn  | Caterpillar | Family | mean  |
| NeRF                    | 0.939    | 0.887 | 0.841 | 0.887       | 0.952  | 0.901 |
| PrecNeRF                | 0.941    | 0.893 | 0.851 | 0.892       | 0.954  | 0.906 |
| NGP                     | 0.945    | 0.908 | 0.859 | 0.912       | 0.964  | 0.918 |
| PrecNGP                 | 0.946    | 0.909 | 0.856 | 0.910       | 0.964  | 0.917 |
| LPIPS-vgg $\downarrow$  | Ignatius | Truck | Barn  | Caterpillar | Family | mean  |
| NeRF                    | 0.086    | 0.183 | 0.279 | 0.193       | 0.079  | 0.164 |
| PrecNeRF                | 0.082    | 0.170 | 0.264 | 0.182       | 0.077  | 0.155 |
| NGP                     | 0.079    | 0.140 | 0.249 | 0.156       | 0.055  | 0.136 |
| PrecNGP                 | 0.077    | 0.136 | 0.245 | 0.151       | 0.053  | 0.132 |
| LPIPS-alex $\downarrow$ | Ignatius | Truck | Barn  | Caterpillar | Family | mean  |
| NeRF                    | 0.082    | 0.153 | 0.225 | 0.160       | 0.060  | 0.136 |
| PrecNeRF                | 0.076    | 0.137 | 0.206 | 0.146       | 0.055  | 0.124 |
| NGP                     | 0.071    | 0.111 | 0.209 | 0.115       | 0.038  | 0.109 |
| PrecNGP                 | 0.067    | 0.104 | 0.199 | 0.111       | 0.036  | 0.104 |

Table 3. Quantitative results on each scene from the TanksTemples dataset

| PyNeRF | PSNR $\uparrow$ |                    |                    |                    | SSIM $\uparrow$ |                    |                    |                    | LPIPS-alex $\downarrow$ |                    |                    |                    |
|--------|-----------------|--------------------|--------------------|--------------------|-----------------|--------------------|--------------------|--------------------|-------------------------|--------------------|--------------------|--------------------|
|        | Full            | 1/2 <sub>res</sub> | 1/4 <sub>res</sub> | 1/8 <sub>res</sub> | Full            | 1/2 <sub>res</sub> | 1/4 <sub>res</sub> | 1/8 <sub>res</sub> | Full                    | 1/2 <sub>res</sub> | 1/4 <sub>res</sub> | 1/8 <sub>res</sub> |
| chair  | 35.31           | 38.47              | 39.46              | 39.38              | 0.984           | 0.992              | 0.995              | 0.996              | 0.011                   | 0.004              | 0.003              | 0.002              |
| drums  | 26.05           | 27.15              | 28.11              | 29.27              | 0.941           | 0.952              | 0.960              | 0.972              | 0.053                   | 0.033              | 0.025              | 0.020              |
| ficus  | 34.23           | 34.69              | 34.37              | 33.86              | 0.983           | 0.989              | 0.991              | 0.989              | 0.012                   | 0.006              | 0.005              | 0.005              |
| hotdog | 37.22           | 39.39              | 40.76              | 41.14              | 0.982           | 0.989              | 0.993              | 0.996              | 0.018                   | 0.006              | 0.003              | 0.002              |
| lego   | 34.93           | 36.42              | 36.40              | 35.31              | 0.977           | 0.988              | 0.991              | 0.991              | 0.014                   | 0.006              | 0.005              | 0.004              |
| mats.  | 29.53           | 30.84              | 32.10              | 33.01              | 0.951           | 0.969              | 0.982              | 0.990              | 0.031                   | 0.014              | 0.008              | 0.005              |
| mic    | 36.38           | 38.59              | 39.70              | 38.97              | 0.991           | 0.995              | 0.995              | 0.997              | 0.006                   | 0.003              | 0.003              | 0.002              |
| ship   | 29.99           | 32.39              | 34.20              | 35.10              | 0.892           | 0.925              | 0.950              | 0.967              | 0.111                   | 0.043              | 0.014              | 0.006              |

  

| PrecPyNeRF | PSNR $\uparrow$ |                    |                    |                    | SSIM $\uparrow$ |                    |                    |                    | LPIPS-alex $\downarrow$ |                    |                    |                    |
|------------|-----------------|--------------------|--------------------|--------------------|-----------------|--------------------|--------------------|--------------------|-------------------------|--------------------|--------------------|--------------------|
|            | Full            | 1/2 <sub>res</sub> | 1/4 <sub>res</sub> | 1/8 <sub>res</sub> | Full            | 1/2 <sub>res</sub> | 1/4 <sub>res</sub> | 1/8 <sub>res</sub> | Full                    | 1/2 <sub>res</sub> | 1/4 <sub>res</sub> | 1/8 <sub>res</sub> |
| chair      | 35.62           | 38.99              | 40.27              | 40.24              | 0.985           | 0.993              | 0.995              | 0.996              | 0.010                   | 0.004              | 0.003              | 0.002              |
| drums      | 26.10           | 27.20              | 28.44              | 29.51              | 0.943           | 0.954              | 0.963              | 0.973              | 0.052                   | 0.032              | 0.023              | 0.014              |
| ficus      | 35.32           | 35.97              | 35.81              | 34.58              | 0.986           | 0.992              | 0.993              | 0.991              | 0.009                   | 0.005              | 0.004              | 0.004              |
| hotdog     | 37.48           | 39.77              | 41.24              | 41.61              | 0.983           | 0.990              | 0.994              | 0.996              | 0.016                   | 0.005              | 0.003              | 0.002              |
| lego       | 35.47           | 37.15              | 37.29              | 36.01              | 0.980           | 0.989              | 0.992              | 0.992              | 0.012                   | 0.005              | 0.004              | 0.004              |
| mats.      | 30.14           | 31.57              | 33.08              | 33.64              | 0.958           | 0.974              | 0.986              | 0.992              | 0.025                   | 0.010              | 0.006              | 0.004              |
| mic        | 36.54           | 38.78              | 39.98              | 39.40              | 0.992           | 0.995              | 0.995              | 0.997              | 0.006                   | 0.003              | 0.002              | 0.002              |
| ship       | 30.15           | 32.50              | 34.42              | 35.38              | 0.894           | 0.927              | 0.951              | 0.969              | 0.108                   | 0.042              | 0.014              | 0.006              |

Table 4. Quantitative results on each scene from the Multiscale Synthetic-NeRF dataset

| PSNR $\uparrow$         | chair | drums | ficus | hotdog | lego  | mats. | mic   | ship  | mean  |
|-------------------------|-------|-------|-------|--------|-------|-------|-------|-------|-------|
| Constant (NGP)          | 35.86 | 25.18 | 33.83 | 37.81  | 36.12 | 29.80 | 37.08 | 31.19 | 33.36 |
| Trapezoid               | 36.06 | 25.39 | 33.96 | 37.77  | 36.28 | 29.86 | 37.26 | 31.27 | 33.48 |
| Parabola                | 35.93 | 25.57 | 34.57 | 37.61  | 36.21 | 29.83 | 37.23 | 31.20 | 33.52 |
| PrecNGP                 | 36.35 | 25.66 | 36.63 | 38.36  | 37.01 | 31.10 | 37.55 | 31.32 | 34.25 |
| SSIM $\uparrow$         | chair | drums | ficus | hotdog | lego  | mats. | mic   | ship  | mean  |
| Constant (NGP)          | 0.986 | 0.932 | 0.982 | 0.983  | 0.981 | 0.950 | 0.992 | 0.900 | 0.963 |
| Trapezoid               | 0.986 | 0.933 | 0.982 | 0.983  | 0.982 | 0.950 | 0.992 | 0.899 | 0.963 |
| Parabola                | 0.986 | 0.935 | 0.984 | 0.983  | 0.981 | 0.949 | 0.992 | 0.899 | 0.964 |
| PrecNGP                 | 0.987 | 0.936 | 0.989 | 0.985  | 0.984 | 0.963 | 0.993 | 0.902 | 0.967 |
| LPIPS-vgg $\downarrow$  | chair | drums | ficus | hotdog | lego  | mats. | mic   | ship  | mean  |
| Constant (NGP)          | 0.021 | 0.088 | 0.025 | 0.031  | 0.022 | 0.069 | 0.013 | 0.132 | 0.050 |
| Trapezoid               | 0.019 | 0.089 | 0.024 | 0.031  | 0.020 | 0.065 | 0.013 | 0.131 | 0.049 |
| Parabola                | 0.020 | 0.084 | 0.024 | 0.032  | 0.021 | 0.067 | 0.013 | 0.129 | 0.049 |
| PrecNGP                 | 0.018 | 0.084 | 0.016 | 0.028  | 0.019 | 0.053 | 0.011 | 0.129 | 0.045 |
| LPIPS-alex $\downarrow$ | chair | drums | ficus | hotdog | lego  | mats. | mic   | ship  | mean  |
| Constant (NGP)          | 0.008 | 0.057 | 0.014 | 0.013  | 0.008 | 0.031 | 0.005 | 0.080 | 0.027 |
| Trapezoid               | 0.008 | 0.059 | 0.013 | 0.013  | 0.007 | 0.030 | 0.005 | 0.080 | 0.027 |
| Parabola                | 0.008 | 0.054 | 0.013 | 0.014  | 0.008 | 0.031 | 0.005 | 0.078 | 0.026 |
| PrecNGP                 | 0.007 | 0.053 | 0.008 | 0.011  | 0.007 | 0.020 | 0.005 | 0.077 | 0.023 |

Table 5. Quantitative results on each scene from the Synthetic-NeRF dataset when comparing PrecNGP with variants of quadrature

| PSNR $\uparrow$         | chair | drums | figus | hotdog | lego  | mats. | mic   | ship  | mean  |
|-------------------------|-------|-------|-------|--------|-------|-------|-------|-------|-------|
| NGP(5e-3)               | 35.86 | 25.18 | 33.83 | 37.81  | 36.12 | 29.80 | 37.08 | 31.19 | 33.36 |
| NGP(1e-2)               | 34.71 | 24.01 | 31.47 | 37.35  | 35.05 | 29.01 | 35.17 | 30.16 | 32.12 |
| NGP(2e-2)               | 32.24 | 23.37 | 28.28 | 36.03  | 32.33 | 27.42 | 32.11 | 28.80 | 30.07 |
| NGP(4e-2)               | 29.58 | 22.28 | 25.57 | 34.23  | 28.51 | 26.16 | 30.08 | 26.91 | 27.91 |
| NGP(8e-2)               | 26.92 | 20.95 | 22.95 | 31.88  | 24.93 | 23.70 | 27.27 | 24.74 | 25.42 |
| PrecNGP(5e-3)           | 36.35 | 25.66 | 36.63 | 38.36  | 37.01 | 31.10 | 37.55 | 31.32 | 34.25 |
| PrecNGP(1e-2)           | 35.68 | 25.01 | 36.50 | 38.23  | 36.74 | 31.19 | 36.58 | 30.90 | 33.85 |
| PrecNGP(2e-2)           | 33.95 | 24.59 | 34.42 | 37.57  | 35.05 | 30.51 | 34.30 | 29.86 | 32.53 |
| PrecNGP(4e-2)           | 31.65 | 23.86 | 31.38 | 36.26  | 31.73 | 29.69 | 32.08 | 28.32 | 30.62 |
| PrecNGP(8e-2)           | 29.34 | 22.76 | 26.73 | 34.37  | 27.83 | 28.23 | 29.96 | 26.48 | 28.21 |
| SSIM $\uparrow$         | chair | drums | figus | hotdog | lego  | mats. | mic   | ship  | mean  |
| NGP(5e-3)               | 0.986 | 0.932 | 0.982 | 0.983  | 0.981 | 0.950 | 0.992 | 0.900 | 0.963 |
| NGP(1e-2)               | 0.981 | 0.916 | 0.974 | 0.981  | 0.977 | 0.944 | 0.988 | 0.891 | 0.956 |
| NGP(2e-2)               | 0.966 | 0.901 | 0.955 | 0.975  | 0.962 | 0.929 | 0.979 | 0.869 | 0.942 |
| NGP(4e-2)               | 0.940 | 0.878 | 0.929 | 0.965  | 0.923 | 0.910 | 0.966 | 0.839 | 0.919 |
| NGP(8e-2)               | 0.907 | 0.850 | 0.898 | 0.949  | 0.866 | 0.875 | 0.946 | 0.803 | 0.887 |
| PrecNGP(5e-3)           | 0.987 | 0.936 | 0.989 | 0.985  | 0.984 | 0.963 | 0.993 | 0.902 | 0.967 |
| PrecNGP(1e-2)           | 0.985 | 0.932 | 0.988 | 0.984  | 0.983 | 0.964 | 0.991 | 0.898 | 0.966 |
| PrecNGP(2e-2)           | 0.975 | 0.924 | 0.983 | 0.981  | 0.976 | 0.959 | 0.986 | 0.886 | 0.959 |
| PrecNGP(4e-2)           | 0.956 | 0.912 | 0.970 | 0.973  | 0.952 | 0.950 | 0.977 | 0.866 | 0.945 |
| PrecNGP(8e-2)           | 0.930 | 0.892 | 0.937 | 0.962  | 0.905 | 0.935 | 0.963 | 0.835 | 0.920 |
| LPIPS-vgg $\downarrow$  | chair | drums | figus | hotdog | lego  | mats. | mic   | ship  | mean  |
| NGP(5e-3)               | 0.021 | 0.088 | 0.025 | 0.031  | 0.022 | 0.069 | 0.013 | 0.132 | 0.050 |
| NGP(1e-2)               | 0.028 | 0.099 | 0.031 | 0.035  | 0.030 | 0.079 | 0.019 | 0.143 | 0.058 |
| NGP(2e-2)               | 0.049 | 0.124 | 0.051 | 0.048  | 0.059 | 0.089 | 0.033 | 0.174 | 0.078 |
| NGP(4e-2)               | 0.080 | 0.150 | 0.080 | 0.068  | 0.120 | 0.106 | 0.052 | 0.216 | 0.109 |
| NGP(8e-2)               | 0.112 | 0.190 | 0.110 | 0.102  | 0.178 | 0.136 | 0.075 | 0.263 | 0.146 |
| PrecNGP(5e-3)           | 0.018 | 0.084 | 0.016 | 0.028  | 0.019 | 0.053 | 0.011 | 0.129 | 0.045 |
| PrecNGP(1e-2)           | 0.022 | 0.085 | 0.017 | 0.030  | 0.021 | 0.054 | 0.014 | 0.134 | 0.047 |
| PrecNGP(2e-2)           | 0.035 | 0.093 | 0.022 | 0.037  | 0.034 | 0.061 | 0.022 | 0.151 | 0.057 |
| PrecNGP(4e-2)           | 0.059 | 0.112 | 0.037 | 0.052  | 0.077 | 0.073 | 0.037 | 0.180 | 0.078 |
| PrecNGP(8e-2)           | 0.090 | 0.135 | 0.074 | 0.070  | 0.137 | 0.085 | 0.054 | 0.219 | 0.108 |
| LPIPS-alex $\downarrow$ | chair | drums | figus | hotdog | lego  | mats. | mic   | ship  | mean  |
| NGP(5e-3)               | 0.008 | 0.057 | 0.014 | 0.013  | 0.008 | 0.031 | 0.005 | 0.080 | 0.027 |
| NGP(1e-2)               | 0.012 | 0.072 | 0.018 | 0.016  | 0.011 | 0.038 | 0.009 | 0.091 | 0.033 |
| NGP(2e-2)               | 0.026 | 0.094 | 0.031 | 0.023  | 0.022 | 0.052 | 0.019 | 0.119 | 0.048 |
| NGP(4e-2)               | 0.058 | 0.125 | 0.052 | 0.038  | 0.057 | 0.070 | 0.035 | 0.159 | 0.074 |
| NGP(8e-2)               | 0.099 | 0.162 | 0.079 | 0.064  | 0.108 | 0.105 | 0.063 | 0.211 | 0.111 |
| PrecNGP(5e-3)           | 0.007 | 0.053 | 0.008 | 0.011  | 0.007 | 0.020 | 0.005 | 0.077 | 0.023 |
| PrecNGP(1e-2)           | 0.009 | 0.059 | 0.008 | 0.012  | 0.007 | 0.020 | 0.006 | 0.082 | 0.025 |
| PrecNGP(2e-2)           | 0.016 | 0.066 | 0.012 | 0.016  | 0.012 | 0.025 | 0.011 | 0.097 | 0.032 |
| PrecNGP(4e-2)           | 0.036 | 0.083 | 0.020 | 0.025  | 0.027 | 0.033 | 0.021 | 0.123 | 0.046 |
| PrecNGP(8e-2)           | 0.068 | 0.108 | 0.044 | 0.039  | 0.063 | 0.044 | 0.042 | 0.158 | 0.070 |

Table 6. Quantitative results on each scene from the Synthetic-NeRF dataset when training NGP and PrecNGP with increasing render step size. The numbers in the parentheses below are render step size used at training time, larger render step size means fewer sampling points.
